# Supplementary material for: Kinetic stability of heteroleptic (β-diketiminato) heavier alkaline-earth (Ca, Sr, Ba) amides
Source: Royal Society of Chemistry journal article supplement (doi:10.1039/b415468a), 2004-12-01
Supplement: b415468a.doc [file b415468a.doc]

**Experimental**

All manipulations involving alkaline earth metals were carried out using standard Schlenk and glovebox techniques under an inert atmosphere of either nitrogen or argon. All solvents were distilled under nitrogen and dried with conventional drying agents. All amines were dried over calcium hydride, vacuum transferred and freeze-thaw degassed prior to use. NMR spectra were recorded at 270 or 500 (1H), 125.8 (13C) and 99.9 (29Si) MHz from samples in either C6D6 or d8-toluene; chemical shifts are given relative to SiMe4. Repeated attempts to accumulate mass spectral data on isolated compounds were unsuccessful due to their air and moisture sensitivity. The ligand precursor **I**H was synthesised by a literature procedure.1 Alkaline earth iodides and KN(SiMe3)2 were purchased from Sigma-Aldrich and used as received.

**NMR-scale experiments**

Standard NMR experiments were conducted using J. Youngs NMR tubes. Samples were prepared under a nitrogen atmosphere in a glovebox operating at <2 ppm of O2. Typically the alkaline earth compound (40 mg) was dissolved in pre-dried deuterated solvent (C6D6 or d8- toluene) and the substrate added as a single aliquot at ambient temperature using a micro-scale pipette.

**[IAe{N(SiMe3)2}(THF)], (Ae = 1, Ca; 2, Sr; 3, Ba):** These compounds were synthesised employing the method reported by Chisholm.13 THF was added to a mixture of the appropriate alkaline earth di-iodide (1 equivalent), potassium bis(trimethylsilyl)amide (2 equivalents) and **I**H (1 equivalent) under argon and the resulting slurry was stirred overnight. Removal of the solvent, extraction with hexane and crystallisation gave the products as colourless crystalline materials. **1:** (1.91g, 2.77 mmol, 76%). Mpt = 123-127 0C. 1H NMR (C6D6);  7.12 (m, 6H, Ar*H*), 4.83 (s, 1H, {C(Me)}2C*H*), 3.35 (t, 3*J*HH = 6.4 Hz, 4H, THF), 3.23 (hept, 3*J*HH = 6.9 Hz, 4H, C*H*Me2), 1.67 (s, 6H, {C(*Me*)}2CH), 1.34 (d, 3*J*HH = 6.9 Hz, 12H, CH*Me*2), 1.24 (d, 3*J*HH = 6.7, 12H, CH*Me*2), 1.07 (m, 4H, THF), 0.18 (s, 18H, Si*Me*3). [Lit.13 1H NMR (C­6D6);  7.20 - 7.10, 4.85, 3.37, 3.25, 1.69, 1.36, 1.26]. **2:** All attempts to purify by recrystallisation were unsuccessful. 1H NMR (C6D6);  7.12 (m, 6H, Ar*H*), 4.79 (s, 1H, {C(Me)}2C*H*), 3.33 (m, 4H, THF), 3.19 (hept, 3*J*HH = 6.9 Hz, 4H, C*H*Me2), 1.70 (s, 6H, {C(*Me*)}2CH), 1.33 (d, 3*J*HH = 6.9 Hz, 12H, CH*Me*2), 1.25 (d, 6.7Hz, 12H, CH*Me*2), 1.11(m, 4H, THF), 0.16 (s, 18H, Si*Me*3). **3:** (0.45g, 0.57 mmol, 18%). Mpt 200 0 C (d). 1H NMR (C6D6);  7.11 (m, 6H, Ar*H*), 4.79 (s, 1H, {C(Me)}2C*H*), 3.26 (m, 4H, THF), 3.17 (hept, 3*J*HH = 6.8 Hz, 4H, C*H*Me2), 1.71 (s, 6H, {C(*Me*)}2CH), 1.32 (d, 3*J*HH = 6.9 Hz, 12H, CH*Me*2), 1.25 (d, 3*J*HH = 6.8 Hz, 12H, CH*Me*2), 1.17 (m, 4H, THF), 0.16 (s, 6H, Si*Me*3). 13C{1H} NMR (C6D6);  162.8, 147.2, 140.8, 124.1, 91.8, 68.2, 28.5, 25.6, 25.2, 24.6, 24.5, 5.6. 29Si{1H} NMR (C6D6);  -18.2. Anal. Calc for C39H67BaN3OSi: C 59.41, H 8.69, N 5.33. Found: C 55.12, H 7.49, N 4.60.

**Attempted Synthesis of [ICa{N(SiMe3)2}(NH2Cy)], 7:** To a stirred solution of **1** (0.5g, 0.72 mmol) in hexane under nitrogen was added a solution of cyclohexylamine (42 μl, 0.72 mmol) in hexane. The resultant solution was stirred overnight and the solvent removed to give the product). 1H NMR (C6D6):  7.15–7.05 (m, 6H, Ar*H*), 4.81 (s, 1H, {C(Me)}2C*H*), 3.20 (hept, 3*J*HH = 6.9 Hz, 4H, C*H*Me2), 2.24 (broad S, 1H, CyC*H*N), 1.66 (s, 6H, {C(*Me*)}2CH), 1.37 (d, 3*J*HH = 6.9 Hz, 12H, CH*Me*2), 1.22 (d, 3*J*HH = 6.9 Hz, 12H, CH*Me*2), 0.87-0.51 (broad series of multiplets, 10H, C6H10). Attempted crystallisation from hexane afforded the homoleptic compound **4**.

**NMR characterisation of [ICa{N(SiMe3)2}(NH2tBu)],** **8:** 1H NMR (C6D6);  0.21 (s, 18H, Si*Me*2), 0.97 (s, 9H, (C*H*­3)3C), 1.23 (d, 12H, 3*J*HH = 6.7 Hz, CH*Me*2), 1.35 (d, 12H, 3*J*HH = 6.9 Hz, CH*Me*2), 1.67 (s, 6H, {C(*Me*)}2CH), 3.21 (hept, 4H, 3*J*HH = 6.7 Hz, C*H*Me2), 4.82 (s, 1H,), 7.05-7.14 (m, 6H, Ar*H*).

**Synthesis of [ICa(NHCH2CH2OCH3)]2, 9:** To a stirred solution of **1** (0.5 g, 0.72 mmol) in tetrahydrofuran under nitrogen was added a solution of methoxyethlyamine (63 μl, 0.72mmol) in tetrahydrofuran. The resultant solution was stirred overnight, evaporated to dryness and the product crystallised from hexane to give **9** as colourless crystals suitable for an X-ray diffraction analysis. (0.20 g, 0.38 mmol, 52 %) Mpt 188 0 C (d). 1H NMR (d8–toluene, 213K);  7.05-6.92 (m, 6H, Ar*H*), 4.58 (s, 1H, {C(Me)}2C*H*), 3.21 (s, 3H, O*Me*), 3.12 (hept, 4H, C*H*Me2), 2.82 (t, 3*J*HH = 4.7 Hz, 2H, C*H*2OMe), 2.03 (distorted dd, 2H, C*H*2NH), 1.52 (s, 6H, {C(*Me*)}2CH), 1.14 (d, J3H-H = 6.9 Hz, 12H, CH*Me*2), 0.97 (d, 12H, CH*Me*2), -1.71 (t, 3*J*HH = 9.6 Hz, 1H, N*H*). 13C NMR (d8-toluene);  164.8, 148.2, 141.7, 123.9, 123.6, 93.4, 80.9, 58.9, 46.1, 27.9, 25.0, 24.7, 24.4. IR (cm-1) (KBr disc); 3647, 3054, 2962, 2927, 2369, 1621, 1551, 1463, 1440, 1381, 1363, 1324, 1277, 1260, 1175, 1100, 935, 799, 789, 758. Anal. Calc for C32H49CaN3O2: C 72.26, H 9.31, N 7.90. Found: C 72.12, H 9.48, N 7.72.

**[ICa{NH(2,6-iPr2C6H3)}(THF)], 11:** To an unstirred solution of **1** (0.40 g, 0.58 mmol) in hexane was added a stoichiometric quantity of 2,6-diisopropylaniline (0.12 g, 0.58 mmol) as a solution in hexane. The product crystallised upon cooling of the solution to 0 0C and X-ray quality crystals were obtained by isolation of this material and recrystallisation from hexane. Yield (0.135g, 0.20 mmol, 35 %). Mpt 179oC (d). 1H NMR (C6D6);  1.10 (m, 4H, THF ), 1.11 (d, 12H, CH*­Me*2), 1.21 (d, 6H, CH*­Me*2), 1.22 (d, 12H, CH*­Me*2), 1.70 (s, 6H, {C(*Me*)}2CH), 2.42 (hept, 2H, 3*J*HH = 6.8 Hz, C*H*Me2), 3.20 (m, 4H, THF), 3.36 (s, 1H), 3.47 (t, 4H), 4.80 (s, 1H, {C(Me)}2C*H*), 6.66 (t, 1H, 3*J*HH = 7.4 Hz, *p*-C6*H*3NH), 7.08 (d, 2H, 3*J*HH = 7.4 Hz, *m*-C6*H*3NH), 7.16 (m, 6H, Ar*H*). IR (cm-1, KBr disc);.3647, 3050, 2962, 2868, 1622, 1551, 1462, 1439, 1378, 1362, 1323, 1262, 1175, 1100, 1056,1020, 934, 800,789, 759. Anal. Calc. for C45H67CaN3O: C 76.54, H 9.56, N 5.95. Found: C 76.00, H 9.05, N 5.50.

**Crystal Structure Determinations**

Data were collected at 173 K on a Nonius kappa CCD diffractometer, **(Mo-K) = 0.71073 Å; details are given in Table 1. An absorption correction (MULTISCAN) was applied. For **9** the C(27) isopropyl group is disordered and was refined with isotropic C atoms and SADI constraints. For **11** the disordered atoms in the THF group were left isotropic. The hexane solvate molecule was disordered about an inversion centre and was included with isotropic C atoms and H atoms omitted. The structures were solved by direct methods (SHELXS-97)1 and refined by full matrix least squares (SHELXL-97)2 with non-H atoms anisotropic and H atoms included in riding mode. CCDC reference numbers XXXX and XXXX. See http://www.rsc.org/supdata/….. for crystallographic data in CIF format.

# References

1. (a) J. Feldman, S. J. McLain, A. Parthasarathy, W. Marshall, J. C. Calabrese and S. D. Arthur, *Organometallics*, 1997, **16**, 1514; (b) M. Stender, R. J. Wright, B. E. Eichler, J. Prust, M. M. Olmstead, H. W. Roesky and P. P. Power, *J. Chem. Soc., Dalton Trans.*, 2001, 3465.
2. G. M. Sheldrick, SHELXS–97, Program for the Solution of Crystal Structures, Göttingen, 1997.
3. G. M. Sheldrick, SHELXL–97, Program for the Refinement of Crystal Structures, Göttingen, 1997.
